# Supplementary material for: Quantitative Mapping of Individual Voxels in the Peritumoral Region of Glioblastoma to Distinguish Between Tumor Infiltration and Edema
Source: Research Square preprint supplement (doi:10.21203/rs.3.rs-263971/v1), 2021-03-01
Supplement: Supplementary file 1 [file 55359142a70f9d35035bb9e0.docx]

**Methods and Materials**

**Patient Selection**

This retrospective study was approved by the ethics committee of the Sunnybrook Health Sciences Centre, Toronto, and the requirement for informed consent of patients was waived. Patients with BM and LGG treated between January 2014 and December 2018 were identified from an institutional database. To minimize interscanner variability, patients were only considered for inclusion if their imaging data were obtained using one of two identical scanners from a single vendor.

Patients with LGG were required to have a histological diagnosis of grade 2 glioma (astrocytoma or oligodendroglioma) from the index lesion without any pathological or radiological features suspicious for high grade glioma (HGG). Patients receiving prior chemotherapy or RT were excluded. Post-operative patients were included, with the surgical cavity and tracks were excluded from the segmented region. For patients with BM, we included treatment-naïve tumors with a known primary malignancy site, with unequivocal metastasis on MRI. Tumors with suspected hemorrhage or prior history of any RT to the brain or head-neck region were excluded.

Further exclusion criteria included the following: (i) lack of contrast-enhanced T1 (T1c), T2-FLAIR (T2f) or diffusion weighted imaging (DWI) MRI sequences; (ii) absence of evaluable size (defined as > 10 mm) of the target lesion; (iii) presence of motion-artifacts and inter-slice misregistration.

The exploratory cohort included patients with GBM treated with adjuvant RT undergoing planning scans in the same MRI scanner (having all the three sequences: T1, T2, DWI). All the patients were required to have a well-defined radiological progression involving the PTR and good quality MRI scans available at the time of recurrence (at least T1c sequence).

**MRI Protocol**

Imaging was performed on one of the two GE Signa HDxT 1.5T MRI scanners using an 8-channel head coil (General Electric Medical Systems, Waukesha, WI, USA). Three sequences were included in the current study: gadolinium (Gd) enhanced 3D T1-weighted FSPGR (T1c); Gd-enhanced T2 fluid-attenuated inversion-recovery PROPELLOR (T2f); and diffusion-weighted imaging-derived apparent diffusion coefficient maps (ADC).

For more than 90% of the patients, the T1c images were acquired axially with an in-plane matrix size of 270×270, with the field-of-view ranging from 22×22 to 27×27 cm2 and the resolution ranging from 0.81×0.81 to 1.0×1.0 mm2. Axial T1c imaging was performed with 1.5 mm slice thickness, and the number of slices ranged from 104 to 130 (15.6 to 19.5 cm S/I coverage). For others, the T1c images were acquired coronally with an in-plane matrix size of 270×270, with the field-of-view ranging from 22×22 to 24×24 cm2 and the resolution ranging from 0.81×0.81 to 0.89×0.89 mm2. Coronal T1c imaging was performed with either 0.8 mm or 0.9 mm slice thickness, and the number for slices ranged from 224 to 232 (18.5 to 20.2 cm A/P coverage). The echo time for all T1c scans was 4.2 ms and the repetition time ranged from 8.26 to 8.69 ms. Gadolinium-based contrast agent (Gadobutrol, Bayer, Canada) was administered at 0.1 mmol/kg for contrast-enhanced T1 weighted images.

The in-plane matrix size of the T2f images was 288×288, with the field-of-view and resolution from 22×22 to 26×26 cm2 and resolution ranging from 0.76×0.76 to 0.90×0.90 mm2, respectively. All T2f imaging was performed with 5 mm slice thickness and a 1 mm gap between slices, and the number of slices ranged from 24 to 30 (14.4 cm to 18 cm axial coverage). The repetition, echo and inversion times for the T2f scans ranged from 8000 to 8600 ms, 114 to 174 ms and 2000 to 2150 ms, respectively.

Diffusion weighted images were obtained using a single-shot echo-planar imaging sequence with 3 diffusion directions and a b-value of 1000 s/mm2 and ADC maps were reconstructed online using GE’s Functool. ADC maps were acquired with an in-plane matrix size of 128x128 across fields-of-view ranging from 27×27 to 28×28 cm2 and resolutions ranging from 2.10×2.10 mm2 to 2.19×2.19 mm2. All ADC maps were obtained with 5 mm slice thickness, and the number of slices ranged from 145 to 170 (14.5 to 17 cm axial coverage). The repetition and echo times for the ADC maps ranged from 7000 to 7425 ms and 61.8 to 72 ms, respectively.

**Image Preprocessing and Segmentation**

Data handling and scripting were performed in Matlab R2018b (The Mathworks, Inc., Natick, MA, USA). T1c scans that were acquired coronally were resliced to axial orientations. For each patient, the T2f and ADC MRI scans were first resampled to match the field-of-view and resolution of the corresponding T1c volume using the FMIRB Software Library (FSL) tool FLIRT [1–3]. Images were then skull stripped using HD-BET, a pre-trained artificial neural network-based automated method that has been shown to perform robustly in the presence of pathological and treatment-induced alterations and is stable for various MR contrasts and acquisition parameters [4]. The extracted brain volumes then underwent rigid registration to the corresponding T1c volumes with FLIRT. In the case of the ADC scans, brain extraction and registration were performed using the b=0 s/mm2 images and then the resulting transformations were applied to the ADC volumes.

Following image registration, the T1c, T2f and ADC volumes were combined into single workspaces for each patient using the software platform ITK-SNAP (<http://www.itksnap.org>). Manual segmentation was performed initially by a radiation oncology fellow (AD), and all cases were individually reviewed by a neuroradiologist (PM, with 8 years of experience) and a neuro-radiation oncologist (AS, with 15 years of experience), and the segments were modified based on consensus amongst the three physicians. For BMs, the PTR region was segmented by identifying areas with T2-hyperintensity surrounding the enhancing tumor. The LGGs were segmented to include the tumor, excluding the surgical cavity for post-operative cases. For the exploratory GBM cohort, the PTR was manually drawn in the RT planning MRI (post-surgery), excluding the surgical cavity and residual enhancing lesion. All segments were manually refined to exclude the cerebrospinal fluid (CSF) within the region of interest.

The resulting segments and images were then transferred to undergo final processing prior to feature extraction. All images and segments were resampled to a resolution of 1×1×1 mm3. Resampled segments were thresholded at an intensity level of 0.9 to provide binary masks. The images were normalized to zero mean and unit standard deviation, multiplied by 100 and the offset by +300 such that the 3-sigma majority of voxels were non-negative.

**Feature Extraction**

The feature extraction was performed using Pyradiomics software (default set of features) (<http://www.pyradiomics.io/pyradiomics.html>). Image discretization using a fixed gray level bin-width rather than a fixed number of bins was performed to improve reproducibility [5, 6]. Discretization was conducted globally by using the maximum and minimum voxel values across the entire brain. Bin-widths were chosen independently for each of the T1c, T2f and ADC scans. The bin-widths were varied, and the corresponding number of bins was computed for each patient. The final value was chosen such that the minimum number of bins was 30. The bin-width was 40 for the T1c scans (32-59 bins), 25 for the T2f scans (30-71 bins) and 20 for the ADC scans (33-56 bins).

The feature set included the following: 18 first-order statistical features; 21 gray level co-occurrence matrix (GLCM) features; 16 gray level size zone (GLSZM) features; 16 gray level run length matrix (GLRLM) features; 5 neighboring gray tone difference matrix (NGTDM) features, and 14 gray level dependence matrix (GLDM) features. A detailed description of the features can be found on the Pyradiomics website. This feature set was extracted from each of the T1c, T2f, and ADC scans for a total of 270 features per LGG and BM voxels. Feature extraction was performed for each voxel using a local patch of 5×5×5 voxels using a sliding window technique. For cases when a local patch extended outside of the segment boundary, only the voxels within the segment were used to compute the feature value by setting the “masked-kernel” parameter to “True.”

**Classification**

Lesions (BM and LGG) were divided into training and testing as follows: the lesion list was shuffled, and entire lesions were successively included in the training cohort until the number of voxels totaled at least 1,000,000, and the remaining lesions were assigned to the testing cohort. Given the large disparity in lesion sizes, this process was repeated using a reshuffled list until a set was produced that was approximately balanced with respect to the number of lesions in each of the training and testing cohorts. The process resulted in 60% of BM voxels and 49% of LGG voxels in the training set. To handle the large amount of data, the training set was linearly subsampled by taking the 270 features from every 100th voxel across the lesions, resulting in a final training set of 20000 voxels, divided evenly between LGG and BM.

All standardization, model fitting, and assessment were performed using Scikit-Learn ([https://scikit-learn.org/stable](https://scikit-learn.org/stable/index.html)). The features in the training set were standardized by removing their means and scaling to unit variance. The testing set was scaled using the means and variances computed from the training set. The SVM classifier based on LIBSVM was used with a radial-basis-function kernel. The regularization parameter C was set to 1, and the kernel coefficient gamma was set to 0.0037, which is the reciprocal of the number of features in the training set. Probability estimates were calibrated during model fitting with internal 5-fold cross-validation using the built-in implementation of Platt scaling provided through LIBSVM.

**Mapping of Post-operative Glioblastoma**

As with the LGG and BM patients, T1c, T2f, and ADC scans obtained for the GBM were subjected to the same post-processing steps outlined above. The extracted features were standardized and subjected to the previously described SVM classifier, and probability estimates of LGG- or BM-like signatures were generated. The classification probability for each voxel was then placed into its corresponding location in the original peritumoral segments to generate 3D probability edema maps for each of the post-operative GBM cases.

Follow-up T1c scans corresponding to the presentation of radiological progression were obtained and then rigidly registered to the original post-operative T1c scans. After registration, regions of enhancing tumor progression were manually segmented using ITK-SNAP. Regions of progression that fell outside of the postoperative PTR were not considered for analysis. Areas of the original peritumoral edema that intersected with the progression regions were labeled as recurrence PTR and those that did not were labeled as non-recurrence PTR.

**References:**

1. Jenkinson M, Smith S (2001) A global optimisation method for robust affine registration of brain images. Med Image Anal 5:143–156. https://doi.org/10.1016/s1361-8415(01)00036-6

2. Jenkinson M, Bannister P, Brady M, Smith S (2002) Improved optimization for the robust and accurate linear registration and motion correction of brain images. Neuroimage 17:825–841. https://doi.org/10.1016/s1053-8119(02)91132-8

3. Greve DN, Fischl B (2009) Accurate and robust brain image alignment using boundary-based registration. Neuroimage 48:63–72. https://doi.org/10.1016/j.neuroimage.2009.06.060

4. Isensee F, Schell M, Pflueger I, et al (2019) Automated brain extraction of multisequence MRI using artificial neural networks. Hum Brain Mapp 40:4952–4964. https://doi.org/10.1002/hbm.24750

5. Duron L, Balvay D, Perre SV, et al (2019) Gray-level discretization impacts reproducible MRI radiomics texture features. PLoS ONE 14:. https://doi.org/10.1371/journal.pone.0213459

6. Carré A, Klausner G, Edjlali M, et al (2020) Standardization of brain MR images across machines and protocols: bridging the gap for MRI-based radiomics. Sci Rep 10:. https://doi.org/10.1038/s41598-020-69298-z
